# Supplementary material for: Life course financial mobility and later-life memory function and decline by gender, and race and ethnicity: an intersectional analysis of the US KHANDLE and STAR cohort studies
Source: PubMed Central journal article supplement — Lancet Healthy Longev. Author manuscript; Available in PMC 2024 Oct 14. (PMC11472306; doi:10.1016/s2666-7568(24)00129-6), 2024-08-30
Supplement: NIHMS2024563-supplement-1.pdf [file NIHMS2024563-supplement-1.pdf]

# THE LANCET

## Healthy Longevity

### **Supplementary appendix**

This appendix formed part of the original submission and has been peer reviewed.  
We post it as supplied by the authors.

Supplement to: Kobayashi LC, Peterson RL, Yu X, et al. Life course financial mobility and later-life memory function and decline by gender, and race and ethnicity: an intersectional analysis of the US KHANDLE and STAR cohort studies. *Lancet Healthy Longev* 2024. [https://doi.org/10.1016/S2666-7568\(24\)00129-6](https://doi.org/10.1016/S2666-7568(24)00129-6)

## **Supplemental Materials**

### **Table of Contents**

**Supplemental Methods** (page 2)

**Supplemental Figure 1.** Study flow diagram. The dates for each data collection wave are shown in (MM/YYYY) format. For each individual study participant, follow-ups occurred, on average, every 16-18 months since baseline in KHANDLE and 13-14 months since baseline in STAR. We used all available verbal episodic memory observations from all waves, which gave a total of 6,616 observations for the 2,340 included individuals. A total of 136 individuals were excluded for the reasons described in the figure, which were non-mutually exclusive. (page 3)

**Supplemental Table 1.** Characteristics of individuals included (2,340/2,476) and excluded (136/2,476) from the analysis (page 4)

**Supplemental Table 2.** Age distribution of the sample, by race/ethnicity, KHANDLE and STAR cohorts, Kaiser Permanente Northern California, 2017-2023, n=2,340 (page 5)

**Supplemental Table 3.** Sample size (persons and verbal episodic memory observations) across intersectional identity strata, KHANDLE and STAR cohorts, Kaiser Permanente Northern California, 2017-2023, n=2,340 (page 6)

**Supplemental Table 4.** Parameter estimates from multilevel models of verbal episodic memory, restricted to individuals born in the United States, KHANDLE and STAR cohorts, Kaiser Permanente Northern California, 2017-2023, n=1,933 (page 7)

**Supplemental Table 5.** Parameter estimates from multilevel models of verbal episodic memory, with additional adjustment for educational attainment, KHANDLE and STAR cohorts, Kaiser Permanente Northern California, 2017-2023, n=2,340 (page 8)

**Supplemental Table 6.** Distribution of education attainment according to life course financial mobility categories, KHANDLE and STAR cohorts, Kaiser Permanente Northern California, 2017-2023, n=2,340 (page 8)

**Supplemental Table 7.** Parameter estimates from multilevel models of verbal episodic memory without random effects for intersectional identity strata, stratified by cohort (KHANDLE and STAR, separately), Kaiser Permanente Northern California, 2017-2023, n=2,340 (page 9)

## Supplemental Methods

The null model specification was as follows:

$$y_{ijk} = \beta_0 + \beta_1 time_{ijk} + \beta_\alpha Covs'_{jk} + \mu_{1jk}^{(2)} + \mu_{1k}^{(3)} + (\mu_{2jk}^{(2)} + \mu_{2k}^{(3)})time_{ij} + \epsilon_{ijk}$$

$$\begin{bmatrix} \mu_{1k}^{(3)} \\ \mu_{2k}^{(3)} \end{bmatrix} \sim N(0, \psi^{(3)}), \psi^{(3)} = \begin{bmatrix} Var(\mu_{1k}^{(3)} | Covs'_{jk}) & Cov(\mu_{1k}^{(3)}, \mu_{2k}^{(3)} | Covs'_{jk}) \\ Cov(\mu_{2k}^{(3)}, \mu_{1k}^{(3)} | Covs'_{jk}) & Var(\mu_{2k}^{(3)} | Covs'_{jk}) \end{bmatrix}$$

$$\begin{bmatrix} \mu_{1jk}^{(2)} \\ \mu_{2jk}^{(2)} \end{bmatrix} \sim N(0, \psi^{(2)}), \psi^{(2)} = \begin{bmatrix} Var(\mu_{1jk}^{(2)} | Covs'_{jk}, \mu_{1k}^{(3)}) & Cov(\mu_{1jk}^{(2)}, \mu_{2jk}^{(2)} | Covs'_{jk}, \mu_{1k}^{(3)}) \\ Cov(\mu_{1jk}^{(2)}, \mu_{2jk}^{(2)} | Covs'_{jk}, \mu_{1k}^{(3)}) & Var(\mu_{2jk}^{(2)} | Covs'_{jk}, \mu_{1k}^{(3)}) \end{bmatrix}$$

$$\epsilon_{ijk} \sim N(0, \sigma_\epsilon^2)$$

In the model,  $y_{ijk}$  is the standardized verbal episodic memory score at wave  $i$  for person  $j$  within intersectional strata  $k$ ;  $\beta_0$  is the grand mean verbal episodic memory score at baseline;  $time_{ijk}$  is the time in years since study baseline;  $\beta_1$  is the corresponding parameter value for time (the mean slope across all persons and strata) for persons in the reference categories of all covariates  $Covs'_{jk}$ ;  $Covs'_{jk}$  is a vector of fixed effects for the confounders (age at baseline, country of birth, maternal education, paternal education, and the interaction between age at baseline and time since baseline);  $\beta_\alpha$  is a vector of parameter values associated with  $Covs'_{jk}$ . The random intercepts for persons at level 2 and intersectional strata at level 3 are denoted by  $\mu_{1jk}^{(2)}$  and  $\mu_{1k}^{(3)}$ , respectively. The person-level random intercept indicates the difference in verbal episodic memory scores between the value predicted for person  $j$  in stratum  $k$  at baseline and the mean predicted value across all persons with the same values for the fixed effects. The stratum-level random intercept indicates the difference in verbal episodic memory scores between the mean predicted value for stratum  $k$  at baseline based on the fixed ( $\beta$ ) parameters and the mean predicted value across all strata. The random slopes for persons at level 2 and intersectional strata at level 3 are denoted by  $(\mu_{2jk}^{(2)} + \mu_{2k}^{(3)})time_{ij}$ . The person-level random slope indicates the difference in the slope between the value predicted for person  $j$  in stratum  $k$  and the grand mean slope  $\beta_1$ , holding the fixed effects constant. The stratum-level random slope indicates the difference in the mean slope for stratum  $k$  from the grand mean slope  $\beta_1$ , holding the fixed effects constant. The stratum-level random intercept and slope are assumed to have a mean of zero and variance  $\psi^{(3)}$ . The person-level random intercept and slope are assumed to have a mean of zero and variance  $\psi^{(2)}$ . The observation-level error term  $\epsilon_{ijk}$  is assumed to have a mean of zero and variance  $\sigma$ . The error terms in the model are assumed to be uncorrelated across levels.

The intersectional model specification was like the null model specification, except with additional individual fixed effects parameters for the three components of the intersectional identity strata (sex/gender, race/ethnicity, and life course financial mobility trajectories):

$$y_{ijk} = \beta_0 + \beta_1 time_{ijk} + \beta_2 woman_i + \beta_3 black\_race\_eth_i + \beta_4 latinx\_race\_eth_i + \beta_5 white\_race\_eth_i + \beta_6 upwardly\_mobile_i + \beta_7 downwardly\_mobile_i + \beta_8 consistently\_low_i + \beta_\alpha Covs'_{jk} + \mu_{1jk}^{(2)} + \mu_{1k}^{(3)} + (\mu_{2jk}^{(2)} + \mu_{2k}^{(3)})time_{ij} + \epsilon_{ijk}$$

$$\begin{bmatrix} \mu_{1k}^{(3)} \\ \mu_{2k}^{(3)} \end{bmatrix} \sim N(0, \psi^{(3)}) \text{ and } \psi^{(3)} = \begin{bmatrix} Var(\mu_{1k}^{(3)} | Covs'_{jk}) & Cov(\mu_{1k}^{(3)}, \mu_{2k}^{(3)} | Covs'_{jk}) \\ Cov(\mu_{2k}^{(3)}, \mu_{1k}^{(3)} | Covs'_{jk}) & Var(\mu_{2k}^{(3)} | Covs'_{jk}) \end{bmatrix}$$

$$\begin{bmatrix} \mu_{1jk}^{(2)} \\ \mu_{2jk}^{(2)} \end{bmatrix} \sim N(0, \psi^{(2)}) \text{ and } \psi^{(2)} = \begin{bmatrix} Var(\mu_{1jk}^{(2)} | Covs'_{jk}, \mu_{1k}^{(3)}) & Cov(\mu_{1jk}^{(2)}, \mu_{2jk}^{(2)} | Covs'_{jk}, \mu_{1k}^{(3)}) \\ Cov(\mu_{1jk}^{(2)}, \mu_{2jk}^{(2)} | Covs'_{jk}, \mu_{1k}^{(3)}) & Var(\mu_{2jk}^{(2)} | Covs'_{jk}, \mu_{1k}^{(3)}) \end{bmatrix}$$

$$\epsilon_{ijk} \sim N(0, \sigma_\epsilon^2)$$

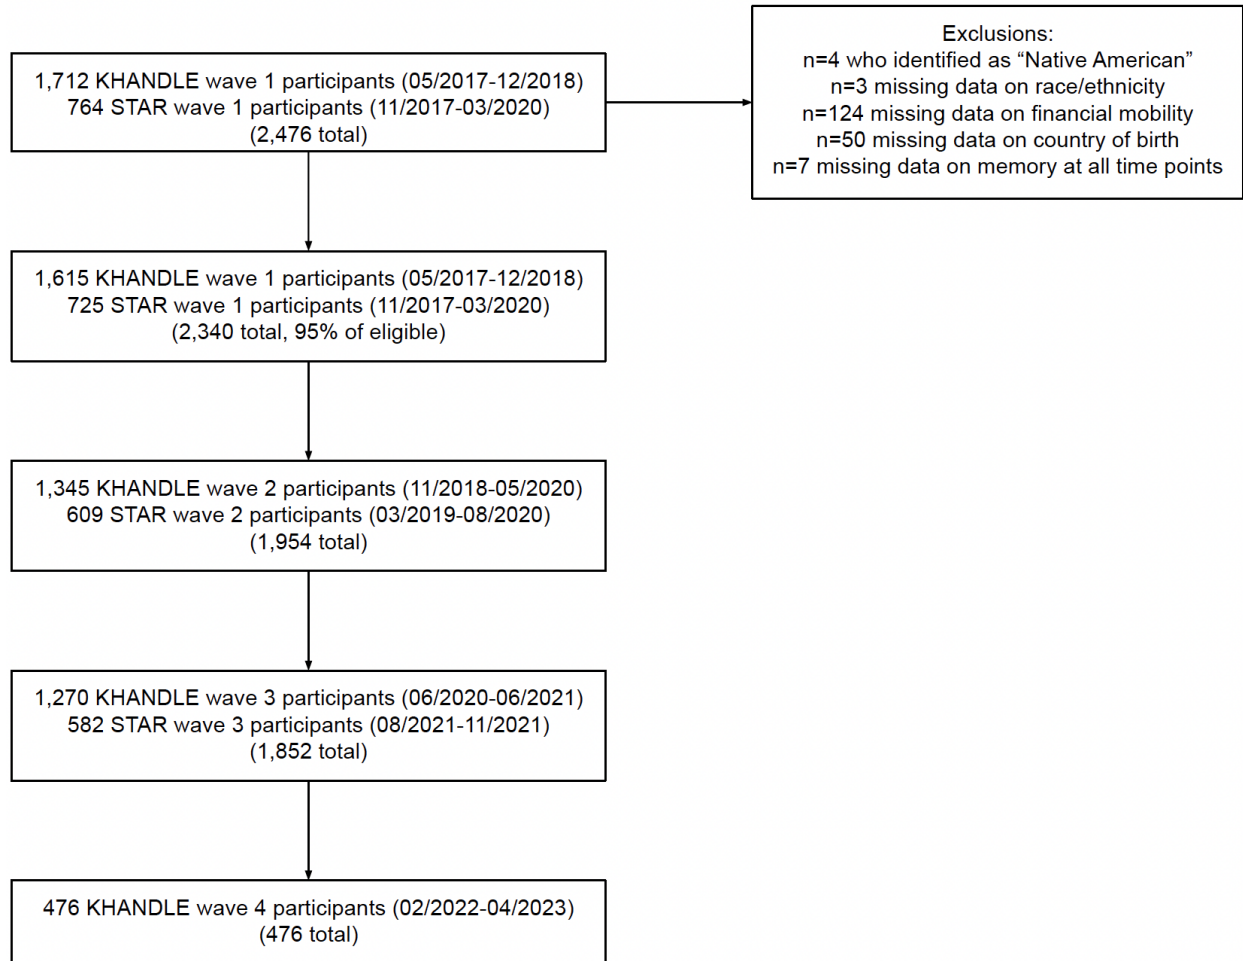

**Supplemental Figure 1.** Study flow diagram. The dates for each data collection wave are shown in (MM/YYYY) format. For each individual study participant, follow-ups occurred, on average, every 16-18 months since wave 1 (baseline) in KHANDLE and 13-14 months since wave 1 (baseline) in STAR. We used all available verbal episodic memory observations from all waves, which gave a total of 6,616 observations for the 2,340 included individuals. A total of 136 individuals were excluded for the reasons described in the figure, which were non-mutually exclusive.

**Supplemental Table 1.** Characteristics of individuals included (2,340/2,476) and excluded (136/2,476) from the analysis

| Baseline characteristic               | Included          | Excluded          | p-value |
|---------------------------------------|-------------------|-------------------|---------|
|                                       | N (%)             | N (%)             |         |
|                                       | 2,340 (95%)       | 136 (5%)          |         |
| Age (mean, SD, range)                 | 73.6 (8.1, 53-89) | 76.1 (8.4, 55-89) | 0.0004  |
| Baseline memory score (mean, SD)      | 0.171 (0.87)      | -0.073 (0.93)     | 0.0032  |
| Gender                                |                   |                   |         |
| Man                                   | 880 (38%)         | 57 (42%)          | 0.314   |
| Woman                                 | 1,460 (62%)       | 79 (58%)          |         |
| Race/ethnicity                        |                   |                   |         |
| Asian                                 | 388 (17%)         | 267(21%)          | 0.345   |
| Black                                 | 1,136 (49%)       | 61 (47%)          |         |
| Latinx                                | 334 (14%)         | 21 (16%)          |         |
| White                                 | 482 (21%)         | 20 (16%)          |         |
| Life course financial mobility        |                   |                   |         |
| Consistently high                     | 1,094 (47%)       | 2 (17%)           | 0.218   |
| Upwardly mobile                       | 330 (14%)         | 5 (42%)           |         |
| Downwardly mobile                     | 654 (28%)         | 3 (25%)           |         |
| Consistently low                      | 262 (11%)         | 2 (17%)           |         |
| Mother's education                    |                   |                   | <0.0001 |
| High school or less                   | 1,465 (63%)       | 49 (36%)          |         |
| Some college or an Associate's degree | 308 (13%)         | 13 (10%)          |         |
| Bachelor's degree or higher           | 240 (10%)         | 8 (6%)            |         |
| Missing or not applicable             | 327 (14%)         | 66 (49%)          |         |
| Father's education                    |                   |                   | <0.0001 |
| High school or less                   | 1,250 (53%)       | 38 (27%)          |         |
| Some college or an Associate's degree | 236 (10%)         | 13 (10%)          |         |
| Bachelor's degree or higher           | 319 (14%)         | 12 (9%)           |         |
| Missing or not applicable             | 535 (23%)         | 73 (54%)          |         |
| Country of birth                      |                   |                   | 0.09    |
| United States                         | 1,933 (83%)       | 65 (76%)          |         |
| Elsewhere                             | 407 (17%)         | 21 (24%)          |         |

**Supplemental Table 2.** Age distribution of the sample, by race/ethnicity, KHANDLE and STAR cohorts, Kaiser Permanente Northern California, 2017-2023, n=2,347

| <b>Baseline characteristic</b> | <b>Total<br/>N (%)</b> | <b>Asian</b>      | <b>Latinx</b>     | <b>Black</b>      | <b>White</b>      |
|--------------------------------|------------------------|-------------------|-------------------|-------------------|-------------------|
|                                | 2,340 (100%)           | 388 (16.6%)       | 334 (14.3%)       | 1,136 (48.6%)     | 482 (20.6%)       |
| Age (mean, SD, range)          | 73.6 (8.1, 53-89)      | 75.6 (6.5, 65-89) | 75.9 (6.3, 65-89) | 70.9 (8.6, 53-89) | 76.6 (7.0, 65-89) |

Note: KHANDLE is the “Kaiser Healthy Aging and Diverse Life Experiences” cohort, and STAR is the “Study of Healthy Aging in African Americans” cohort. Both draw from the same sampling frame of community-dwelling, long-term members of Kaiser Permanente Northern California, an integrated healthcare delivery system, in Northern California. Eligibility for KHANDLE and STAR varied based on age and race/ethnicity, as seen in the demographic differences in this table.

**Supplemental Table 3.** Sample size (persons and verbal episodic memory observations) across intersectional identity strata, KHANDLE and STAR cohorts, Kaiser Permanente Northern California, 2017-2023, n=2,340

| <b>Intersectional identity strata<br/>(sex/gender, race/ethnicity, financial mobility)</b> | <b>N persons<br/>(Model level 2)</b> | <b>N memory<br/>observations<br/>(Model level 1)</b> |
|--------------------------------------------------------------------------------------------|--------------------------------------|------------------------------------------------------|
| Man; Asian; Consistently high                                                              | 104                                  | 301                                                  |
| Man; Asian; Downwardly mobile                                                              | 22                                   | 67                                                   |
| Man; Asian; Upwardly mobile                                                                | 44                                   | 126                                                  |
| Man; Asian; Consistently low                                                               | 13                                   | 34                                                   |
| Man; Black; Consistently high                                                              | 175                                  | 465                                                  |
| Man; Black; Downwardly mobile                                                              | 81                                   | 202                                                  |
| Man; Black; Upwardly mobile                                                                | 62                                   | 164                                                  |
| Man; Black; Consistently low                                                               | 38                                   | 90                                                   |
| Man; Latinx; Consistently high                                                             | 54                                   | 164                                                  |
| Man; Latinx; Downwardly mobile                                                             | 29                                   | 81                                                   |
| Man; Latinx; Upwardly mobile                                                               | 28                                   | 87                                                   |
| Man; Latinx; Consistently low                                                              | 26                                   | 66                                                   |
| Man; White; Consistently high                                                              | 126                                  | 395                                                  |
| Man; White; Downwardly mobile                                                              | 44                                   | 115                                                  |
| Man; White; Upwardly mobile                                                                | 23                                   | 61                                                   |
| Man; White; Consistently low                                                               | 11                                   | 33                                                   |
| Woman; Asian; Consistently high                                                            | 113                                  | 343                                                  |
| Woman; Asian; Downwardly mobile                                                            | 49                                   | 137                                                  |
| Woman; Asian; Upwardly mobile                                                              | 32                                   | 101                                                  |
| Woman; Asian; Consistently low                                                             | 12                                   | 33                                                   |
| Woman; Black; Consistently high                                                            | 303                                  | 839                                                  |
| Woman; Black; Downwardly mobile                                                            | 279                                  | 768                                                  |
| Woman; Black; Upwardly mobile                                                              | 90                                   | 260                                                  |
| Woman; Black; Consistently low                                                             | 108                                  | 287                                                  |
| Woman; Latinx; Consistently high                                                           | 75                                   | 215                                                  |
| Woman; Latinx; Downwardly mobile                                                           | 66                                   | 179                                                  |
| Woman; Latinx; Upwardly mobile                                                             | 25                                   | 73                                                   |
| Woman; Latinx; Consistently low                                                            | 31                                   | 81                                                   |
| Woman; White; Consistently high                                                            | 144                                  | 453                                                  |
| Woman; White; Downwardly mobile                                                            | 84                                   | 247                                                  |
| Woman; White; Upwardly mobile                                                              | 27                                   | 81                                                   |
| Woman; White; Consistently low                                                             | 23                                   | 68                                                   |

**Supplemental Table 4.** Parameter estimates from multilevel models of verbal episodic memory, restricted to individuals born in the United States, KHANDLE and STAR cohorts, Kaiser Permanente Northern California, 2017-2023, n=1,933

| Parameter                                   | Null model<br>Coef. (95% CI) | Main effects model<br>Coef. (95% CI) |
|---------------------------------------------|------------------------------|--------------------------------------|
| <b>Fixed effects</b>                        |                              |                                      |
| Intercept                                   | 0.019 (-0.101, 0.148)        | -0.102 (-0.235, 0.030)               |
| Baseline age (continuous, years)            | -0.042 (-0.047, -0.037)      | -0.042 (-0.047, -0.037)              |
| Gender                                      |                              |                                      |
| Man (reference)                             | -                            | -                                    |
| Woman                                       | -                            | 0.616 (0.536, 0.697)                 |
| Race/ethnicity                              |                              |                                      |
| Asian (reference)                           | -                            | -                                    |
| Black                                       | -                            | -0.299 (-0.428, -0.171)              |
| Latinx                                      | -                            | -0.124 (-0.280, -0.033)              |
| White                                       | -                            | 0.006 (-0.132, 0.145)                |
| Life course financial mobility              |                              |                                      |
| Consistently high (reference)               | -                            | -                                    |
| Upwardly mobile                             | -                            | -0.052 (-0.166, 0.061)               |
| Downwardly mobile                           | -                            | -0.167 (-0.264, -0.070)              |
| Consistently low                            | -                            | -0.184 (-0.315, -0.052)              |
| Time since baseline (continuous, years)     | -0.040 (-0.065, -0.014)      | -0.042 (-0.068, -0.015)              |
| Time*Baseline age                           | -0.002 (-0.004, -0.000)      | -0.002 (-0.004, -0.000)              |
| <b>Random intercepts</b>                    |                              |                                      |
| Intersectional strata-level                 | 0.117 (0.065, 0.211)         | 0.003 (0.000, 0.090)                 |
| Person-level                                | 0.451 (0.405, 0.503)         | 0.452 (0.406, 0.503)                 |
| <b>Random slopes</b>                        |                              |                                      |
| Intersectional strata-level                 | 0.000 (0.000, 9.277)         | 0.000 (0.000, 0.009)                 |
| Person-level                                | 0.014 (0.007, 0.025)         | 0.013 (0.007, 0.025)                 |
| <b>Variance partition coefficient (VPC)</b> |                              |                                      |
| VPC, intersectional strata-level (%)        | 13%                          | 0.4%                                 |
| VPC, person-level (%)                       | 65%                          | 60%                                  |

Note: The null and main effects models are additionally adjusted for age at baseline, mother's education, father's education, and mode of interview. The VPC indicates the proportion of baseline memory variance attributable to differences between intersectional identity strata and differences between persons.



**Supplemental Table 5.** Parameter estimates from multilevel models of verbal episodic memory, with additional adjustment for educational attainment, KHANDLE and STAR cohorts, Kaiser Permanente Northern California, 2017-2023, n=2,340

| Parameter                                   | Null model<br>Coef. (95% CI) | Main effects model<br>Coef. (95% CI) |
|---------------------------------------------|------------------------------|--------------------------------------|
| <b>Fixed effects</b>                        |                              |                                      |
| Intercept                                   | 0.019 (-0.101, 0.148)        | -0.781 (-1.055, -0.507)              |
| Baseline age (continuous, years)            | -0.043 (-0.068, -0.018)      | -0.043 (-0.048, -0.039)              |
| Gender                                      |                              |                                      |
| Man (reference)                             | -                            | -                                    |
| Woman                                       | -                            | 0.616 (0.536, 0.697)                 |
| Race/ethnicity                              |                              |                                      |
| Asian (reference)                           | -                            | -                                    |
| Black                                       | -                            | -0.292 (-0.399, -0.185)              |
| Latinx                                      | -                            | -0.070 (-0.188, 0.047)               |
| White                                       | -                            | -0.004 (-0.114, 0.106)               |
| Life course financial mobility              |                              |                                      |
| Consistently high (reference)               | -                            | -                                    |
| Upwardly mobile                             | -                            | -0.032 (-0.129, 0.065)               |
| Downwardly mobile                           | -                            | -0.121 (-0.201, -0.041)              |
| Consistently low                            | -                            | -0.065 (-0.177, -0.048)              |
| Time since baseline (continuous, years)     | -0.043 (-0.068, -0.018)      | -0.044 (-0.069, -0.019)              |
| Time*Baseline age                           | -0.003 (-0.005, -0.001)      | -0.003 (-0.005, -0.001)              |
| <b>Random intercepts</b>                    |                              |                                      |
| Intersectional strata-level                 | 0.103 (0.058, 0.182)         | 0.002 (0.000, 0.047)                 |
| Person-level                                | 0.430 (0.388, 0.477)         | 0.429 (0.387, 0.476)                 |
| <b>Random slopes</b>                        |                              |                                      |
| Intersectional strata-level                 | 0.000 (0.000, 0.009)         | 0.000 (0.000, 0.006)                 |
| Person-level                                | 0.015 (0.008, 0.026)         | 0.014 (0.008, 0.026)                 |
| <b>Variance partition coefficient (VPC)</b> |                              |                                      |
| VPC, intersectional strata-level (%)        | 12%                          | 0.2%                                 |
| VPC, person-level (%)                       | 62%                          | 57%                                  |

Note: The null and main effects models are additionally adjusted for age at baseline, mother’s education, father’s education, country of birth, mode of interview, and the participant’s educational attainment. The VPC indicates the proportion of baseline memory variance attributable to differences between intersectional identity strata and differences between persons.

**Supplemental Table 6.** Distribution of education attainment according to life course financial mobility categories, KHANDLE and STAR cohorts, Kaiser Permanente Northern California, 2017-2023, n=2,340

| Educational attainment    | Life course financial mobility |                   |                 |                   |
|---------------------------|--------------------------------|-------------------|-----------------|-------------------|
|                           | Consistently low               | Downwardly mobile | Upwardly mobile | Consistently high |
|                           | 262 (11%)                      | 654 (28%)         | 330 (14%)       | 1,094 (47%)       |
| Grade school              | 23 (9%)                        | 13 (2%)           | 4 (1%)          | 7 (<1%)           |
| Some high school          | 22 (8%)                        | 26 (4%)           | 14 (4%)         | 11 (1%)           |
| Technical or trade school | 23 (9%)                        | 46 (7%)           | 7 (2%)          | 26 (2%)           |
| Some college              | 94 (36%)                       | 259 (40%)         | 112 (34%)       | 345 (32%)         |
| College                   | 37 (14%)                       | 111 (17%)         | 82 (25%)        | 306 (28%)         |
| Graduate school           | 20 (8%)                        | 101 (15%)         | 75 (23%)        | 309 (28%)         |
| High school or GED        | 43 (16%)                       | 98 (15%)          | 36 (11%)        | 90 (8%)           |

**Supplemental Table 7.** Parameter estimates from multilevel models of verbal episodic memory without random effects for intersectional identity strata, stratified by cohort (KHANDLE and STAR, separately), Kaiser Permanente Northern California, 2017-2023, n=2,340

| Parameter                                   | Main effects model:<br>KHANDLE cohort<br>Coef. (95% CI) | Main effects model:<br>STAR cohort<br>Coef. (95% CI) |
|---------------------------------------------|---------------------------------------------------------|------------------------------------------------------|
| <b>Fixed effects</b>                        |                                                         |                                                      |
| Intercept                                   | -0.279 (-0.146, 0.090)                                  | -0.403 (-0.532, -0.275)                              |
| Baseline age (continuous, years)            | -0.051 (-0.057, -0.044)                                 | -0.038 (-0.046, -0.031)                              |
| Gender                                      |                                                         |                                                      |
| Man (reference)                             | -                                                       | -                                                    |
| Woman                                       | 0.606 (0.526, 0.687)                                    | 0.561 (0.445, 0.677)                                 |
| Race/ethnicity                              |                                                         |                                                      |
| Asian (reference)                           | -                                                       | -                                                    |
| Black                                       | -0.345 (-0.469, -0.221)                                 | -                                                    |
| Latinx                                      | -0.173 (-0.292, -0.054)                                 | -                                                    |
| White                                       | -0.054 (-0.166, 0.058)                                  | -                                                    |
| Life course financial mobility              |                                                         |                                                      |
| Consistently high (reference)               | -                                                       | -                                                    |
| Upwardly mobile                             | -0.046 (-0.163, 0.072)                                  | -0.041 (-0.206, 0.125)                               |
| Downwardly mobile                           | -0.193 (-0.290, -0.096)                                 | -0.132 (-0.255, -0.008)                              |
| Consistently low                            | -0.139 (-0.271, -0.006)                                 | -0.234 (-0.429, -0.039)                              |
| Time since baseline (continuous, years)     | -0.046 (-0.074, -0.018)                                 | -0.046 (-0.074, -0.018)                              |
| Time*Baseline age                           | -0.004 (-0.007, -0.002)                                 | -0.004 (-0.007, -0.002)                              |
| <b>Random intercepts</b>                    |                                                         |                                                      |
| Person-level                                | 0.466 (0.412, 0.527)                                    | 0.429 (0.362, 0.509)                                 |
| <b>Random slopes</b>                        |                                                         |                                                      |
| Person-level                                | 0.010 (0.004, 0.025)                                    | 0.031 (0.017, 0.056)                                 |
| <b>Variance partition coefficient (VPC)</b> |                                                         |                                                      |
| VPC, person-level (%)                       | 57%                                                     | 61%                                                  |

Note: The models are additionally adjusted for age at baseline, mother's education, father's education, country of birth, and mode of interview. The VPC indicates the proportion of baseline memory variance attributable to differences between persons. No variable for race/ethnicity was included in the model for the STAR cohort because this cohort is 99% Black.
